# Supplementary material for: Analyzing Illumina Gene Expression Microarray Data from Different Tissues: Methodological Aspects of Data Analysis in the MetaXpress Consortium
Source: PLoS One. 2012 Dec 7;7(12):e50938. doi: 10.1371/journal.pone.0050938 (PMC3517598; doi:10.1371/journal.pone.0050938)
Supplement: Table S1 — Cohort descriptive of additional parameters. (XLSX) [file pone.0050938.s008.xlsx]

## Sheet: Table S1
Cohort descriptive of additional parameters
Variable (mean/SD)	SHIP-TREND	KORA F4	GHS
Neutrophils [%]	57.56±8.27	-	63.09±8.57
Monocytes [%]	8.99±2.30	-	6.52±1.83
Basophils [%]	0.47±0.30	-	0.64±0.38
Lymphocytes [%]	30.08±7.24	-	26.49±7.45
Eosinophils [%]	2.59±1.76	-	2.16±1.49
Mean corpuscular hemoglobin concentration (MCHC) [g/dl]	33.39±0.92	34.00±0.75	-
Serum magnesium concentration [%]	0.89±0.08	-	-
Serum calcium [mmol/l]	2.30±0.09	-	2.41±0.09
Serum sodium [mmol/l]	139.34±2.25	-	140.31±2.51
Alanine aminotransferase (ALAT) [µkatal/l]	0.44±0.29	-	0.6±0.28
Aspartate aminotransferase (ASAT) [µkatal/l]	0.32±0.17	-	0.44±0.15
Lactate dehydrogenase (LDH) [µkatal/l]	2.80±0.46	-	3.02±0.51
Partial thromboplastin time [s]	25.86±2.49	-	30.65±4.04
Vitamin B12 [pg/ml]	459.32±173.18	-	-
Cystatin C [mg/l]	0.70±0.12	-	-
Red blood cell distribution width (RDW) [%]	13.21±0.88	-	-
Serum Creatinine [µmol/l]	74.73±15.18	-	-
Serum fibrinogen (Clauss method) [g/l]	3.01±0.72	-	3.69±0.83
Serum glucose [mmol/l]	97.93±11.19	-	96.07±18.06
Serum uric acid [µmol/l]	279.32±74.43	-	-
