# Supplementary material for: Analyzing Illumina Gene Expression Microarray Data from Different Tissues: Methodological Aspects of Data Analysis in the MetaXpress Consortium
Source: PLoS One. 2012 Dec 7;7(12):e50938. doi: 10.1371/journal.pone.0050938 (PMC3517598; doi:10.1371/journal.pone.0050938)
Supplement: Table S2 — Eigen-R2 results for SHIP-TREND of all 66 parameters. (XLSX) [file pone.0050938.s009.xlsx]

## Sheet: Table S2
Eigen-R2 results based on the expression values after log2 transformation (L2T) and variance-stabilizing transformation (VST) for SHIP-TREND of all 66 parameters
	eigen-R2
Parameter	L2T1	VST1	L2T2	L2T3	Principle component (PC) with the lowest associaton p-value among first 50 PCs1	p-value of PC with lowest associaton p-value1	p-value of association with first PC1
Ilmunina chip (12 arrays per chip)	0.337483	0.366639	0.165028	0.088046	2	0	1.08067e-52
RNA amplification batch (96 well plate)	0.20179	0.234753	7.21174e-17	-	2	0	8.94189e-31
Sample storage time* [days]	0.0285582	0.0323827	3.49427e-18	0.0781439	2	1.88794e-46	4.49244e-05
Month of blood donation	0.187217	0.213726	0.0384061	0.155164	2	0	9.52059e-27
Time of blood donation [h]	0.00198547	0.00224372	0.00133637	0.0340804	48	8.11859e-09	0.343193
Month of RNA isolation	0.0853325	0.0995014	0.000302125	-	2	2.42583e-144	1.50794e-08
RNA isolation batch (96 well plate)	0.164725	0.189939	0.0174079	0.0801599	2	0	5.23964e-22
Fasting state (hrs)	0.00174823	0.00188518	0.00122888	0.0295559	41	0.00116717	0.108066
Signal to noise ratio	0.0765982	0.079296	0.0103271	0.104876	2	2.17145e-146	7.83e-28
Number of detected Genes (Detection p-value < 0.01)	0.0335982	0.0347499	0.0257588	0.115068	3	2.90093e-100	4.05531e-60
RNA integrity number (RIN)	0.0135812	0.0148141	-6.36176e-18	0.0810812	3	2.29439e-32	1.65343e-12
Sex	0.00947646	0.0116314	0.0104976	0.0450358	11	9.54265e-48	0.00193652
Age [years]	0.00578911	0.00746811	0.00586092	0.0459248	19	2.2147e-11	0.00665053
Body height [cm]	0.00535462	0.00620053	0.00565991	0.0524089	13	4.22923e-26	0.000177769
Body weight [km]	0.00592425	0.00852447	0.00734913	0.0387747	5	1.27384e-16	0.422857
Body mass index (BMI) [kg/m2]	0.00684629	0.0098595	0.00763678	0.0303448	5	9.77632e-18	0.000404014
Hip circumference [cm]	0.00596851	0.00793191	0.00540322	0.0372485	5	1.18565e-10	0.00190612
Waist circumference [cm]	0.00768922	0.0111337	0.00921107	0.0337041	5	4.07849e-19	0.0823003
Waist-to-hip ratio (WHR)	0.00652621	0.00894592	0.00800973	0.0501538	10	2.00532e-23	0.774404
Neutrophils [%]	0.0271418	0.0405298	0.0327757	0.0632095	5	6.45713e-93	0.461293
Monocytes [%]	0.00792348	0.0111924	0.00973999	0.0387871	10	3.30161e-45	0.67824
Basophils [%]	0.00319102	0.0039415	0.00287871	0.0371422	39	1.64751e-08	0.821725
Lymphocytes [%]	0.0276742	0.0410188	0.0336335	0.0653345	5	1.24227e-89	0.531229
Eosinophils [%]	0.00441756	0.00577998	0.00510622	0.0520694	39	3.06348e-39	0.542534
White blood cell count [Gpt/l]	0.00889829	0.012918	0.01066	0.0721856	5	1.99769e-21	0.998384
Red blood cell count [Tpt/l]	0.00384251	0.00476682	0.0042363	0.0460978	13	2.13191e-20	0.0665743
Hematocrit	0.00471656	0.00601618	0.00499828	0.0667056	13	1.1171e-26	0.173855
Hemoglobin [mmol/l]	0.00498825	0.0064414	0.00582142	0.0655874	13	1.21451e-31	0.0276814
Platelets [Gpt/l]	0.0031803	0.00406471	0.003265	0.0485838	26	6.19435e-17	0.636564
Mean cell hemoglobin (MCH) [fmol]	0.00225064	0.00289906	0.00251794	0.0460168	16	1.50393e-06	0.39469
Mean corpuscular hemoglobin concentration (MCHC) [g/dl]	0.00671807	0.00826663	0.00407762	0.0487835	13	3.68033e-12	0.000193838
Mean cell volume (MCV) [fl]	0.00204962	0.002312	0.00175719	0.0433834	15	2.98995e-05	0.335204
Mean platelet volume (MPV) [fl]	0.00163533	0.00176377	0.00104275	0.0487526	17	0.00566502	0.226544
Serum magnesium concentration [%]	0.00928597	0.0122692	0.00098919	0.0385182	2	1.20408e-12	0.267798
Serum potassium [mmol/l]	0.00272476	0.00345707	0.00249793	0.058062	4	0.00027087	0.477817
Serum calcium [mmol/l]	0.0030815	0.00399557	0.00231457	0.0469775	3	6.22761e-06	0.209418
Serum sodium [mmol/l]	0.00356064	0.0045986	0.00144633	0.039745	6	5.47302e-05	0.611353
Alanine aminotransferase (ALAT) [µkatal/l]	0.00415847	0.00597868	0.00510428	0.0401441	5	1.24969e-13	0.321267
Aspartate aminotransferase (ASAT) [µkatal/l]	0.00316354	0.00421271	0.00387968	0.0404959	10	3.69625e-10	0.131179
Serum α-amylase [µkatal/l]	0.00116884	0.00132933	0.00119055	0.0444369	13	0.0156371	0.524529
γ-glutamyltransferase (GGT) [µkatal/l]	0.00269474	0.00365973	0.00334448	0.0442617	35	1.19514e-07	0.0293005
Lactate dehydrogenase (LDH) [µkatal/l]	0.00388918	0.00490394	0.00361306	0.037352	3	1.01673e-08	0.000171976
Partial thromboplastin time [s]	0.0036405	0.00422783	0.00193805	0.039222	1	2.57093e-06	2.57093e-06
High density lipoprotein (HDL) [mmol/l]	0.00488206	0.0069692	0.00577297	0.0407844	5	5.06579e-13	0.735548
Low density lipoprotein (LDL) [mmol/l]	0.00132185	0.00153758	0.00158375	0.0363358	40	1.87596e-05	0.213249
Total cholesterol [mmol/l]	0.00133953	0.00145404	0.00146079	0.0359777	25	4.04176e-05	0.00324745
Serum triglycerides [mmol/l]	0.00680387	0.0105017	0.0081377	0.0552794	5	2.42734e-26	0.00260694
Active smoker [%]	0.00364281	0.00485778	0.00386447	0.0789486	19	1.5793e-12	0.774266
Alcohol consumption [g/day]	0.00229833	0.00266736	0.00259196	0.0288521	11	3.36701e-09	0.0556475
Systolic blood pressure (SBP) [mmHg]	0.00407203	0.00546801	0.0048775	0.0314989	11	2.16242e-14	0.0105612
Diastolic blood pressure (DBP) [mmHg]	0.00373308	0.00498191	0.00402342	0.0334375	11	1.55891e-07	0.0306169
Serum Glycated hemoglobin (HbA1c) concentration [%]	0.00211214	0.00274478	0.00132108	0.0405637	15	8.85848e-07	5.9173e-05
Vitamin B12 [pg/ml]	0.00483198	0.0053077	0.000966928	0.0375876	2	1.48536e-07	0.00350416
Cystatin C [mg/l]	0.00314807	0.00395094	0.00395302	0.0343109	10	4.96447e-14	0.000717099
Folic acid [ng/ml]	0.00124701	0.00133672	0.00123009	0.0467483	18	0.00841511	0.147493
Pulse pressure [mmHg]	0.00250773	0.00314309	0.00314443	0.0330664	11	2.39655e-10	0.0703448
Red blood cell distribution width (RDW) [%]	0.00339355	0.00446143	0.00395375	0.0384632	16	1.15705e-06	0.00125013
Serum Creatinine [µmol/l]	0.00389014	0.00490789	0.00435253	0.0363014	10	2.20823e-16	0.458668
Serum fibrinogen (Clauss method) [g/l]	0.00504627	0.00675545	0.00463318	0.0399574	8	4.25793e-07	0.00324745
Serum glucose [mmol/l]	0.00437399	0.00579402	0.00408273	0.0363259	11	3.52431e-07	5.9173e-05
Serum lipase [µkatal/l]	0.00199019	0.00242706	0.00180132	0.0452517	5	0.000213987	0.606765
Serum uric acid [µmol/l]	0.0052619	0.00717301	0.00625885	0.0413458	11	7.58435e-24	0.889091
Thyroid peroxidase antibodies (TPO-AK) [U/ml]	0.00109887	0.0011107	0.00100108	0.0414973	33	0.00906786	0.558424
Thyroid volume (log)	0.00257021	0.00320068	0.00335291	0.0498033	10	1.22702e-07	0.684974
Thyroid-stimulating hormone (TSH) [mU/l]	0.00147452	0.00163247	0.00122796	0.0672121	48	0.021615	0.109384
Urin creatinine [mmol/l]	0.00217527	0.00268251	0.00263356	0.056872	25	6.07586e-08	0.611544
*Sample storage time: Time between blood donation and RNA isolation
#technical parameters: RNA amplification batch, RNA integrity number (RIN), and sample storage time
- indicates missing value (could not be calculted using the specific sample)
p-values below 1x10-200 are given as 0
1 Analysis based on all 991 SHIP-TREND samples; L2T
2 Analysis based on all 991 SHIP-TREND samples, L2T, and additional adjustmend for technical parameters
3 Analysis based on a random subset of 24 SHIP-TREND samples, processed on two Illimina chips and one RNA amplification plate, L2T
