# Supplementary material for: Analyzing Illumina Gene Expression Microarray Data from Different Tissues: Methodological Aspects of Data Analysis in the MetaXpress Consortium
Source: PLoS One. 2012 Dec 7;7(12):e50938. doi: 10.1371/journal.pone.0050938 (PMC3517598; doi:10.1371/journal.pone.0050938)
Supplement: Table S4 — Association results of SNPs in probe analysis with p-value<0.05. (XLSX) [file pone.0050938.s011.xlsx]

## Sheet: Table S4
Association results of SNPs in probe analysis with p-value < 0.05
SNP ID	SNP RSID	Probe ArrayAddressId	Association beta	Association SE	Association p-value	Probe mean Expression	Probe SD Expression	Effect direction per SNP mismatch allele	number of SNPs in probe	SNP position relative to probe start	Chromosome	SNP position	SNP coded allele	SNP noncoded allele	SNP strand	SNP frequency of coded allele	SNP imputation quality	SNP function	proxy SNP for conditional analysis	association p-value conditioned on proxy SNP	proxy SNP R2 with SNP	proxy SNP imputation quality	n_total for association	Probe-Chromosome-Orientation	ProbeId	probe gene	probe start position (HG19)	ProbeSequence
2:228222293:SNP	rs8222	2100068	0.364757	0.0102676	7.5909e-175	6.56255	0.399899	-1	2	29	2	228222293	G	C	+	0.373742	0.99417	untranslated-3	2:228185809:SNP	2.58611e-17	0.953647	0.99476	986	+	ILMN_2198408	MFF	228192227	TGCATCGACACTTCAACATTAACACTTTGAAAGTCATGGTCTGGTGCCAG
11:107978149:SNP	rs73000548	6060025	-0.462187	0.0213397	2.03377e-84	7.67351	0.337387	-1	1	18	11	107978149	T	G	+	0.0339757	1	untranslated-3	11:107877139:SNP	3.28537e-42	0.527513	1	986	+	ILMN_2176955	CUL5	107879407	CTCAAGCTGGTTTTTCTGTTCTCATGTAAGTGACTGGGATGCTGTCTTAT
5:467143:SNP	rs72698512	4730682	-0.172246	0.00964362	1.667e-61	7.41115	0.301205	-1	2	39	5	467143	T	G	+	0.192191	1	untranslated-3	5:433258:SNP	4.09194e-05	0.947173	0.99686	986	+	ILMN_1789419	EXOC3	443333	GCTCCTTTTAGCTGCACGGCCTGTCTTTAGGTGCCAGTGTGATGCACCGG
5:467144:SNP	rs72698513	4730682	-0.171604	0.00964763	4.45931e-61	7.41115	0.301205	-1	2	40	5	467144	C	T	+	0.192698	1	untranslated-3	5:433258:SNP	0.000112426	0.947173	0.99686	986	+	ILMN_1789419	EXOC3	443333	GCTCCTTTTAGCTGCACGGCCTGTCTTTAGGTGCCAGTGTGATGCACCGG
7:30202331:SNP	rs62623406	1740458	-0.4664	0.0274256	1.27886e-56	9.06485	0.414029	-1	3	27	7	30202331	T	C	+	0.0294118	1	untranslated-3	7:30149186:SNP	1.03981e-45	0.2354	0.83231	986	+	ILMN_1672605	C7orf41	30174551	CCTCCCCTGAGAGTGAGGACCTCATCCGACCATGTAATTACCATTCGCTT
16:57505625:SNP	rs117019691	7200142	-0.46262	0.0282616	4.60833e-53	9.00007	0.255865	-1	1	37	16	57505625	G	C	+	0.0240117	0.92471	near-gene-3,untranslated-3	16:57401909:SNP	5.78421e-34	0.437499	0.85306	986	+	ILMN_1659411	POLR2C	57496550	TCATTCTCTGTCCAGCAGTCATGAACCCCTTCACCTCCAATGACCTGATC
16:88928996:SNP	rs11641280	5810598	0.147884	0.0111885	1.19106e-36	6.61234	0.244828	1	2	1	16	88928996	G	C	+	0.190563	0.80569	intron	16:88921634:SNP	0.0596953	0.640344	0.97885	986	+	ILMN_1859908		88927604	CCTGGGCCTTTGCTGACATACCAGCCCCAGACTACTTAAATTCAGCtttt
15:81295980:SNP	rs74525494	1070156	-0.196212	0.0158843	1.51e-32	6.8366	0.243971	-1	2	38	15	81295980	G	C	+	0.0568458	0.99521	unknown	15:81250530:SNP	0.416411	1	0.99002	986	+	ILMN_1781565	MESDC1	81293294	GGTTGTGTTATCACTCCCACCCCCTACCCCAGCCCGTCTTCCGGAATTTC
3:10168732:SNP	rs75972783	2000546	-0.300046	0.0278466	1.40042e-25	8.15998	0.300215	-1	1	7	3	10168732	A	G	+	0.0283976	1	untranslated-3	3:10064383:SNP	7.75631e-06	0.853412	0.75269	986	+	ILMN_1764500	C3orf10	10157332	GCCTAGGTGGCTTACCAGCCCAAGTCCCCATGTTTGGACTTTCAGCTGAC
19:549080:SNP	rs59771750	1710279	-0.275241	0.026247	2.20088e-24	7.99707	0.390554	-1	2	6	19	549080	G	A	+	0.0470953	0.86634	coding-synon	19:540023:SNP	1.59134e-12	0.517049	0.87722	986	+	ILMN_1690561	GZMM	544026	CTCCAAGTGCTGGACACCCGCATGTGTAACAACAGCCGCTTCTGGAACGG
5:174954861:SNP	rs156373	4730411	-0.0919793	0.00966706	1.5384e-20	6.70469	0.247511	-1	1	28	5	174954861	C	T	+	0.165822	1	untranslated-3	5:174896228:SNP	1.51183e-15	0.215384	0.98407	986	+	ILMN_2205935	SFXN1	174905513	CTGTAGATGTTTAACGTCATAGACAGTTGGCCCTCTGTATCCGTGAGCTC
2:228222271:SNP	rs1127399	2100068	-0.266644	0.0282414	2.91204e-20	6.56255	0.399899	-1	2	7	2	228222271	A	G	+	0.0754615	0.99878	untranslated-3	2:228183471:SNP	0.00759964	0.940003	0.99042	986	+	ILMN_2198408	MFF	228192227	TGCATCGACACTTCAACATTAACACTTTGAAAGTCATGGTCTGGTGCCAG
9:100778005:SNP	rs113437897	3850053	-0.259855	0.0289257	1.45129e-18	12.1287	0.244944	-1	1	37	9	100778005	T	C	+	0.0140771	0.88899	untranslated-3	9:100729542:SNP	0.00227367	0.914729	0.8557	986	+	ILMN_1684293	ANP32B	100745488	TGCTGTAGCGTGGATAGCTGTGATTGGTGAGTCAACCGTCTGTGGCTACC
10:91087805:SNP	rs41284136	520408	-0.415002	0.0466435	2.9756e-18	7.86715	0.679845	-1	1	29	10	91087805	C	G	+	0.0116283	0.99717	unknown	10:91068399:SNP	0.147	1	0.9906	986	+	ILMN_2239754	IFIT3	91087601	ACAAATCAGCCTGGTCACCAGCTTTTCGGAACAGCAGAGACACAGAGGGC
6:10731218:SNP	rs7113	3840167	0.0748574	0.00886475	1.17726e-16	8.94398	0.32219	-1	1	29	6	10731218	T	C	+	0.636917	1	untranslated-3	6:10686061:SNP	5.50321e-15	0.186507	1	986	+	ILMN_2175131	TMEM14C	10723337	GGTGTCAGCTTTCAGGGCTCTGAAACCCTATTCCCTGCTCTGAGGAACAG
6:26104448:SNP	rs198852	3890349	-0.100918	0.0119782	1.37155e-16	11.3541	0.493722	-1	3	14	6	26104448	G	A	+	0.381339	1	coding-synon	6:26104096:SNP	0.0146528	0.795515	1	986	+	ILMN_2075334	HIST1H4C	26104175	TAGTATATGCCCTAAAACGTCAGGGGCGCACTCTGTATGGCTTCGGCGGC
21:35515222:SNP	rs62213666	6400195	-0.332055	0.0396339	1.99063e-16	10.494	0.24808	-1	1	12	21	35515222	A	G	+	0.00862272	0.8953	untranslated-3					986	+	ILMN_1723874	MRPS6	35445822	AATACCTCCTGGGATTGTGAGCTAGTCATTCAGCCTGTGTAACCATGTGG
1:1170148:SNP	rs61353980	2510477	-0.326423	0.0400504	1.17722e-15	7.56922	0.255131	-1	1	21	1	1170148	T	C	+	0.0116633	1	untranslated-3	1:1160267:SNP	0.421834	1	0.8675	986	+	ILMN_1739749	B3GALT6	1167628	GTTTGGAATTGCTTGAGGAACCCTGCGTGTGCTTGGAGAGGCCAGAGGGC
2:231268201:SNP	rs56251216	6660750	-0.0510876	0.00636537	3.05523e-15	6.16883	0.137613	-1	2	3	2	231268201	C	G	+	0.354462	1	unknown	2:231176040:SNP	4.19318e-09	0.392841	0.81261	986	+	ILMN_2187058	LOC93349	231191893	GTGAGCCACCACACCTGGCCACTCGCAAGACCTTTTATCTGAAAACCAGC
2:231268211:SNP	rs11681358	6660750	-0.0510876	0.00636537	3.05523e-15	6.16883	0.137613	-1	2	13	2	231268211	G	A	+	0.354462	1	unknown	2:231176040:SNP	4.19318e-09	0.392841	0.81261	986	+	ILMN_2187058	LOC93349	231191893	GTGAGCCACCACACCTGGCCACTCGCAAGACCTTTTATCTGAAAACCAGC
16:88929011:SNP	rs75898184	5810598	-0.131829	0.0185991	2.70533e-12	6.61234	0.244828	-1	2	16	16	88929011	G	A	+	0.0568306	0.96033	intron	16:88898785:SNP	0.0155952	0.921386	1	986	+	ILMN_1859908		88927604	CCTGGGCCTTTGCTGACATACCAGCCCCAGACTACTTAAATTCAGCtttt
8:117783975:SNP	rs16888728	6220037	-0.0858001	0.0128461	4.15105e-11	6.55148	0.245334	-1	1	46	8	117783975	T	C	+	0.0912779	1	missense	8:117768128:SNP	0.209786	0.994047	0.99983	986	+	ILMN_2043828	UTP23	117778741	GTGGTCCCAATCCTCTTAGTTGTTTGAAGAAAAAGAAAAAGGCACCGGAC
6:52272426:SNP	rs116301436	2070451	0.221544	0.033895	1.04304e-10	8.04068	0.322384	1	1	50	6	52272426	T	C	+	0.021462	0.81016	untranslated-3					986	+	ILMN_1694589	PAQR8	52226925	CCTCCAGATGGCATTCATGTCTTACTCAGAAAGGGCACTGCCATTGTCCC
19:39789115:SNP	rs30461	3290743	-0.0643178	0.0104918	1.29911e-09	6.25938	0.139206	-1	2	14	19	39789115	G	A	+	0.0856998	1	missense	19:39781507:SNP	7.00744e-05	0.282717	0.93909	986	+	ILMN_2149624	IL29	39786964	TGTGGCCGATGGGAACCTGTGTCTGAGAACGTCAACCCACCCTGAGTCCA
17:45017859:SNP	rs758392	3850747	-0.0356677	0.00598376	3.57169e-09	6.10236	0.133123	-1	3	28	17	45017859	G	A	+	0.455375	1	intron,untranslated-3	17:44996100:SNP	0.0486369	0.763873	1	986	+	ILMN_1722812	GOSR2	45000485	GCTGCGGTGCCAGGGACCTAGCGCAGGACTTTTGGTAATCCATAAAATGG
19:49994470:SNP	rs59192944	3840091	-0.0652713	0.011085	5.46302e-09	6.45457	0.187616	-1	3	32	19	49994470	A	T	+	0.107013	0.99987	intron	19:49987811:SNP	0.597012	1	0.9989	986	+	ILMN_1667609	SNORD35A	49994431	GATGTCCTTATCTCACGATGGTCTGCGGATGTCCCTGTGGGAATGGCGAC
8:128753298:SNP		6550600	-0.53304	0.0940457	1.93291e-08	7.88133	0.467903	-1	1	37	8	128753298	G	A	+	0.00574544	0.50852						986	+	ILMN_2110908	MYC	128748314	ACTTGTTTCAAATGCATGATCAAATGCAACCTCACAACCTTGGCTGAGTC
3:148614447:SNP	rs61733454	2340743	-0.217922	0.0395578	4.68377e-08	6.83893	0.379717	-1	1	44	3	148614447	T	C	+	0.0372252	0.82757	coding-synon	3:148566250:SNP	0.000422445	0.476519	0.92296	986	+	ILMN_1766551	CPA3	148583042	CCTTCCAGAATCCCGGATAAAGCCAACGTGCAGAGAGACCATGCTAGCTG
17:29061632:SNP	rs73267861	1690280	-0.0485992	0.00920821	1.63051e-07	6.26361	0.138589	-1	1	43	17	29061632	A	G	+	0.114604	1	unknown	17:29057326:SNP	0.786187	1	0.99078	986	+	ILMN_1808515	SUZ12P	29061080	GCTAAGTTAAATGAGTACAACTGCTTCTCTTGAGTTCTGCTCGGTAACAA
19:49994476:SNP	rs56974957	3840091	-0.0508579	0.0100669	5.27131e-07	6.45457	0.187616	-1	3	38	19	49994476	C	T	+	0.143509	1	intron	19:49990793:SNP	0.894101	1	1	986	+	ILMN_1667609	SNORD35A	49994431	GATGTCCTTATCTCACGATGGTCTGCGGATGTCCCTGTGGGAATGGCGAC
1:159277689:SNP	rs41264475	3360615	-0.490916	0.0996769	9.99149e-07	8.64971	0.634135	-1	1	29	1	159277689	A	C	+	0.010142	1	missense	1:159240076:SNP	0.000494808	0.397428	0.8308	986	+	ILMN_1688423	FCER1A	159259505	GAACCAGGAAAGGCTTCAGACTTCTGAACCCACATCCTAAGCCAAACCCC
17:57478276:SNP	rs10853012	1110465	0.0527853	0.0109327	1.61227e-06	7.61248	0.443985	1	2	2	17	57478276	A	T	+	0.137353	0.99943	untranslated-3	17:57362194:SNP	5.99982e-07	0.10931	0.94315	986	+	ILMN_1677098	YPEL2	57409052	GTATGGAGCTGTTGCGGGTTTGCTCCTTTTTCTTGCTTTGCGTGCTCAGT
8:2147426:SNP	rs2306255	2350064	0.570969	0.132533	1.82311e-05	6.1902	0.1361	1	2	24	8	2147426	A	G	+	0.000508114	0.99801	unknown	8:2065298:SNP	0.0481345	1	0.94503	986	+	ILMN_1911083		2147222	ACCTGTGAGTGGCAGGTGCGCGTGGAGTCAGTTCCCCTCCATGCCCGCCT
19:50478962:SNP	rs12609811	2450707	0.0444266	0.0103778	2.05585e-05	6.54164	0.207157	1	1	1	19	50478962	T	C	+	0.186105	1	unknown	19:50471300:SNP	0.693184	1	0.99859	986	+	ILMN_2229261	SIGLEC16	50472911	CGTATAAAACTAAGCTGTGCCCCAACCACGCTGACCATGTCATCAGGACC
1:160287905:SNP	rs12080551	4050358	-0.513375	0.122665	3.12232e-05	7.94294	0.4331	-1	1	47	1	160287905	T	C	+	0.0010142	1	intron	1:160187895:SNP	1.84582e-08	0.499492	1	986	+	ILMN_1732080	SUMO1P3	160287054	CTCCTGGACTGTGACTTTCAGTGGGAGATGGAAGTGTTTCAGAGAACTGA
20:139538:SNP		3420703	152.528	36.5845	3.34471e-05	6.13566	0.131241	1	3	48	20	139538	G	A	+	2.0284e-06	0.003998						986	+	ILMN_1694973	DEFB127	138185	GCCTGAGGCACTATGTGAAAATGGGAGATACTGTTGCCTCAATATCAAGG
3:195428120:SNP	rs1874019	3060341	-0.101392	0.0244891	3.78662e-05	6.7675	0.328456	-1	1	13	3	195428120	T	C	+	0.134505	0.72036	unknown	3:195424995:SNP	0.538919	0.933715	0.71993	986	+	ILMN_1765032	LOC440993	195426821	GGGCCCAGGATGCTTGTCTCTCAGCTCCCATCCTGTGTACTTCCACATTG
12:14976178:SNP	rs7307438	2340605	-0.0316994	0.00782852	5.57055e-05	6.30421	0.145807	-1	1	34	12	14976178	A	T	+	0.161765	1	missense	12:14938731:SNP	0.602065	0.963779	1	986	+	ILMN_2234709	C12orf60	14956505	GGCCATGTGCTCTGTGGTTCAGAAGAGTACCAATGTAGAGGAGTTGCATC
2:70096862:SNP	rs114517801	110095	-0.0753104	0.0199921	0.000175702	7.67106	0.342356	-1	1	12	2	70096862	C	T	+	0.0405882	0.87169	coding-synon	2:70042613:SNP	0.662733	0.857857	0.84989	986	+	ILMN_1670532	GMCL1	70056817	TACTGCTGGCGTTGGACAGGTTTTAACTTCGGCTTCGACCTACTTGTAAC
11:89703632:SNP	rs79666078	2070068	0.0274956	0.00760391	0.000315439	6.37233	0.164607	1	2	44	11	89703632	T	A	+	0.437627	0.67332	missense	11:89687739:SNP	0.0863581	0.755033	0.69607	986	+	ILMN_1768365	TRIM64	89701671	ATGTACAGAGAGCTGTGGGAGACATGCCACGTGCCTGACGTGGAGCTGCT
7:37780626:SNP	rs61729277	1440360	-0.0952585	0.0268774	0.000413618	6.55737	0.188459	-1	2	11	7	37780626	T	C	+	0.0162272	1	coding-synon	7:37759902:SNP	0.67425	0.769387	0.99329	986	+	ILMN_2092333	GPR141	37779995	GGTGCAGAAGCTACGCCACTCTTTACTATCCCACCAGGAGTTCTGGGCTC
2:239360853:SNP	rs113291974	1820347	-0.0795494	0.0225761	0.000446624	7.18085	0.296103	1	1	47	2	239360853	A	G	+	0.0457779	0.9679	untranslated-3	2:239326143:SNP	0.753687	0.975494	0.92618	986	+	ILMN_1683096	ASB1	239335625	GACGGTGGGAGGGTGAGATGTGAAGATGTGGGATGAACCTGGAATGAACG
13:20246060:SNP		60370	42.3835	12.2639	0.000573374	8.1332	0.220682	1	1	34	13	20246060	G	A	+	6.08519e-06	0.010161						986	+	ILMN_2054213	MPHOSPH8	20207879	GGACTGGGCGGAGTTCTCTTCAGACCGATTCCTATACTCTCTTTGACAGC
10:133754153:SNP	rs118091986	5130470	14.34	4.20124	0.000669789	6.44729	0.169308	1	1	46	10	133754153	T	C	+	4.66531e-05	0.014345	coding-synon,untranslated-5					986	+	ILMN_1683589	PPP2R2D	133747959	TTCCTGCAGAGAAGTCTGGCAGGGGTGTGAATTCTCTCTTCCCTTCAGGG
19:3163554:SNP		5670424	21.0325	6.17195	0.000683326	8.06786	0.362897	1	1	11	19	3163554	C	T	+	1.41988e-05	0.027986						986	+	ILMN_1773963	GNA15	3136190	CACTGTCACTTTCAGAGCTCGGTGGCTCACAGCGTGTCCTGCCCCGGTTT
19:1497762:SNP	rs112208222	5820600	-0.0507039	0.0149333	0.000714624	6.41567	0.152433	-1	1	8	19	1497762	A	G	+	0.0491886	1	untranslated-3	19:1488466:SNP	0.222059	0.92172	0.96717	986	+	ILMN_1697460	REEP6	1491164	AGTGCCCGAGCTGGTCCCCTGCCATTCCGGGACCTCTCTGGAGTACACTT
11:59865671:SNP	rs2847655	2360470	0.0311827	0.00931284	0.000845849	6.4273	0.22471	-1	1	2	11	59865671	C	T	+	0.404665	1	untranslated-3	11:59856028:SNP	0.44167	0.864311	1	986	+	ILMN_1806721	MS4A2	59856136	GCCCACCTCAGGCAGACACAGAGCACAATGCTGGGGTTCTCTTCACACTA
7:32802479:SNP		4860685	16.4499	4.97245	0.000975311	6.62613	0.196236	1	1	9	7	32802479	T	C	+	1.72414e-05	0.030219						986	+	ILMN_1751227	LOC401321	32798897	GAGCTCCGCTCTTAAGACACGAGTCTGCCGACGCTCCCGGCCGAATAAAA
3:186303443:SNP	rs114769793	3190452	-0.166158	0.0514797	0.00129215	9.00215	0.321211	-1	1	37	3	186303443	A	G	+	0.00377586	0.90877	untranslated-3					986	+	ILMN_1753243	DNAJB11	186287951	ACCTCTCCCTTTGGGGATTTAATGTCTGGTGCTGCCGCCTGAGTTTCAAG
1:144614952:SNP		6040180	-0.253909	0.0788659	0.00132904	6.44619	0.180327	-1	3	10	1	144614952	C	G	+	0.0200908	0.085447						986	+	ILMN_1776838	LOC728895	144593695	TGTGGTGAAGGATCCTAAAGTGCTGTGGGAGTGATCACATTTTTCACAAC
17:66508243:SNP	rs8080306	4390102	0.0167173	0.00545998	0.00226397	6.17408	0.113004	1	1	17	17	66508243	A	C	+	0.713996	1	near-gene-5,untranslated-5	17:66505019:SNP	0.0136827	0.842702	0.99072	986	+	ILMN_2277077	PRKAR1A	66508109	GAGAGCGAAGAGCAGGCGGAGGAACAAAGGCGACCCAAGACACCCAGAGA
3:187088926:SNP	rs1533594	1450427	-0.0323539	0.0106807	0.00252052	6.67438	0.245257	-1	3	4	3	187088926	A	G	+	0.821501	1	missense	3:187080751:SNP	0.837514	0.946123	1	986	+	ILMN_2173975	RTP4	187086167	GCTGCATGACAAAGCCGTCCAAATCCCTACTCCCCCACCTAAAGACTGGG
4:16229881:SNP	rs114549620	3780240	-0.0844454	0.0279071	0.00254733	7.07242	0.217935	-1	1	27	4	16229881	C	A	+	0.0211202	0.99425	near-gene-5	4:16147757:SNP	0.140014	1	0.98339	986	+	ILMN_1666633	FLJ39653	16228285	CAGGAGCTGGAAGGGTAGGAATCCCAAATTCTGTTGCCTAAGGCAGCCAG
1:51435946:SNP	rs41285700	4920593	-0.0615276	0.0203638	0.00258537	6.90622	0.254652	-1	2	18	1	51435946	T	C	+	0.0400609	1	untranslated-5	1:51401209:SNP	0.13183	0.947684	0.98576	986	+	ILMN_1656415	CDKN2C	51435641	CCAGTCCTTCTGTCAGTCTCCGATGCCATCATGCAGCCTGGTTAGGAGCA
9:134385435:SNP	rs3887873	1300364	-0.0240187	0.007984	0.002698	6.21334	0.124945	-1	2	44	9	134385435	T	C	+	0.13641	1	intron,missense	9:134318529:SNP	0.324341	0.961781	0.99999	986	+	ILMN_2238506	POMT1	134378288	TGATGTCCAGTGCTGCATGAGGCCGGCCTGTATGGGGCAGATGCGGATGT
9:140176601:SNP	rs117602392	1110139	2.88496	0.969427	0.00299714	7.1334	0.270883	1	2	50	9	140176601	A	G	+	9.6856e-05	0.19092	untranslated-3					986	+	ILMN_1813641	C9orf167	140172279	AGCGTGGGCCATTCATCCACCTGTCAGTCAACAACACCCGCTGAGCATCG
1:184597933:SNP		2070470	-0.166099	0.056566	0.00340329	6.40644	0.154789	-1	2	38	1	184597933	A	G	+	0.00460497	0.67226						986	+	ILMN_1797735	C1orf21	184356149	CCCCAGCTCTCTCCTGATTGGAATTCTTTGAACCCTCGAAGTGCTCCAGC
18:3418158:SNP		2450743	0.710493	0.244178	0.00370424	5.97805	0.140725	1	2	4	18	3418158	T	G	+	0.000498479	0.31277						986	+	ILMN_2247842	TGIF1	3412071	CACGTGGTAGAAGCTGGCTAACCTCCACTTCCACATTCCAGCCCAAGGGA
17:45017837:SNP	rs11657819	3850747	-0.0269428	0.00926098	0.0037096	6.10236	0.133123	-1	3	6	17	45017837	A	G	+	0.123225	1	intron,untranslated-3	17:44989888:SNP	0.543452	0.246329	0.97038	986	+	ILMN_1722812	GOSR2	45000485	GCTGCGGTGCCAGGGACCTAGCGCAGGACTTTTGGTAATCCATAAAATGG
20:3028774:SNP	rs41281236	3310445	-0.151024	0.0534475	0.00482026	6.90793	0.248192	-1	3	40	20	3028774	T	C	+	0.00826471	0.94522	untranslated-3	20:2932443:SNP	0.595721	0.681477	0.99931	986	+	ILMN_1676026	MRPS26	3026674	CCCTAGAGTGGTTTCCATCTCACAGAGAATCAGACAGGGCCACAGCCCCC
1:40759581:SNP		5390543	-0.522324	0.185618	0.00499738	9.3155	0.309871	-1	1	8	1	40759581	G	A	+	0.000497972	0.98199						986	+	ILMN_1656413	ZMPSTE24	40723732	GGGATCAACTGTACGCCTTTGGTATCTGACCATAAAGTCTTTTGCTCCGC
11:123777820:SNP		6580563	0.749762	0.268482	0.0053368	6.1574	0.136793	1	3	21	11	123777820	C	A	+	0.00024645	0.47794						986	+	ILMN_1773278	OR8D4	123777138	TCCTCACCAGCATCCTGCGCATCCACTCTAAAAAGGGCAGGTGCAAAGCG
1:34329406:SNP	rs80270883	1260041	-0.0953111	0.034348	0.00563413	6.1575	0.132661	-1	1	48	1	34329406	A	C	+	0.00760649	1	untranslated-5	1:34275435:SNP	0.0188903	0.451725	0.72075	986	+	ILMN_1785655	HMGB4	34326075	GAAGGCAGACCCCATGGCCTGTCACTACAGCCTAGGGATTTTAAGCCCCT
1:4851545:SNP	rs17345239	4070220	-0.0169409	0.00610749	0.00565252	6.09081	0.126546	-1	2	17	1	4851545	G	T	+	0.295639	1	unknown	1:4845892:SNP	0.0989007	0.969469	1	986	+	ILMN_1913982		4847557	GGACAAGTCACAGAGATCTCGCCATGGTTAGCACCAGGGACAAGTCTGGC
15:40866599:SNP		5820333	0.676629	0.244575	0.00577853	8.44358	0.245086	1	1	36	15	40866599	G	A	+	0.000314909	0.39115						986	+	ILMN_1730077	RPUSD2	40861536	GGACGGGCTTCTAAAGAGACCTGCTCATACTTGCTACCTCCTTCCAGTGG
14:21571623:SNP	rs1057718	4640725	-0.0214527	0.0078033	0.00609124	6.44505	0.188495	-1	1	34	14	21571623	C	G	+	0.582647	0.99832	intron,untranslated-3	14:21564434:SNP	0.0978453	0.825858	0.9934	986	+	ILMN_1778843	LOC643382	21567095	ACCTCACCACCCTGAAAAGCTGCTTTCTCCCTTGCATCCATATCCTCTCT
15:39546724:SNP		7400603	0.280953	0.10303	0.00651468	6.21236	0.197491	1	2	13	15	39546724	A	G	+	0.00296856	0.3617						986	+	ILMN_1812249	C15orf54	39542884	GGTATAAACCCGGAATTGGCTGTGGGGAGTTAGACAGGGAAAATGTCCAC
8:96168839:SNP	rs79037660	840095	1.71059	0.630308	0.00677375	6.63875	0.308207	1	1	36	8	96168839	T	A	+	0.00048073	0.088575	untranslated-3					986	+	ILMN_1766115	PLEKHF2	96146037	GCTGGTACATAGGAATCTAGCAAATTCAGGAACCAAGGGGAAATGTTGTG
4:75974976:SNP		1240037	0.845502	0.315575	0.00751031	6.5599	0.215457	1	1	25	4	75974976	A	G	+	0.000911765	0.18412						986	+	ILMN_1656560	PARM1	75858297	GCCCTTCATCTTGCTTGCAAGTGTGCATGGTTCAATCCCTCACATCCAGG
8:55542985:SNP	rs73679499	3130040	-0.300547	0.113471	0.00821881	6.14556	0.121467	-1	4	32	8	55542985	A	G	+	0.000507099	1	untranslated-3					986	+	ILMN_2217848	RP1	55528626	TCCCATGAGATGAAGCACATGTGACGAATACGGACTAGATAACCTCTAAG
9:71397923:SNP	rs41287413	6350154	-0.562385	0.217358	0.00982324	6.99754	0.254866	-1	1	1	9	71397923	A	G	+	0.000416836	0.72649	intron,untranslated-3					986	+	ILMN_1723353	FAM122A	71394963	GCCCCTGATTTTGCCTTAAGTTCTTGCCTGAGTGATCTCCCAGCCTGTCT
6:160328809:SNP		4070292	8.89367	3.44277	0.00993929	6.29819	0.20768	1	1	48	6	160328809	T	C	+	2.68763e-05	0.045578						986	+	ILMN_1788769	MAS1	160327973	GGGAACCTACACCACATTTCCCTGCTCTTCTCCACAATCAACAGTAGCGC
1:12854530:SNP	rs1063776	6650730	-0.0203249	0.00792104	0.0104467	6.15533	0.140902	-1	3	33	1	12854530	G	C	+	0.843103	0.99887	missense	1:12850754:SNP	0.864476	0.991952	0.97556	986	+	ILMN_2112551	PRAMEF1	12851545	GGTGCCATCATTACACGTCAGATAATGAACTCCAAGGACGGTTAGTTGCC
12:16506356:SNP		3180674	21.1758	8.25892	0.010505	6.01892	0.12724	1	1	6	12	16506356	G	C	+	9.12779e-06	0.012769						986	+	ILMN_1687387	MGST1	16506350	GAATTCAAGTCCTAAAGCCTACAGTTTTGAATACTACTGAAATGACAAGT
20:30127105:SNP	rs45565636	270039	-0.130959	0.0512343	0.0107449	7.4933	0.263517	-1	2	49	20	30127105	A	G	+	0.00949594	0.57066	intron,untranslated-3	20:30048758:SNP	0.419402	0.498945	0.52395	986	+	ILMN_1766269	HM13	30102240	CCCCAGCTTGTGACTACAGAGATGTCCCAGTATGTTTCTTTCTGCCCCGT
2:120414023:SNP		2810243	-3.3954	1.34366	0.0116712	6.37551	0.162817	-1	1	35	2	120414023	G	A	+	6.28803e-05	0.10864						986	+	ILMN_1688126	PCDP1	120302046	CGAGGAGATGAGGAACCTGCGGGGCAAAGCACTCAACACATACCTGATTC
1:26646726:SNP	rs1071849	20129	-0.0307146	0.0123371	0.0129636	9.8485	0.686859	-1	2	41	1	26646726	G	A	+	0.768256	1	near-gene-5,missense	1:26618829:SNP	0.560494	1	0.99908	986	+	ILMN_2208903	CD52	26644410	AACGACACCAGCCAAACCAGCAGCCCCTCAGCATCCAGCAACATAAGCGG
1:26646730:SNP	rs17645	20129	-0.0307146	0.0123371	0.0129636	9.8485	0.686859	-1	2	45	1	26646730	G	A	+	0.768256	1	near-gene-5,missense	1:26618829:SNP	0.560494	1	0.99908	986	+	ILMN_2208903	CD52	26644410	AACGACACCAGCCAAACCAGCAGCCCCTCAGCATCCAGCAACATAAGCGG
8:87166308:SNP		1980706	-28.105	11.3365	0.0133471	6.249	0.144676	-1	2	32	8	87166308	C	T	+	1.11562e-05	0.0067162						986	+	ILMN_1799889	ATP6V0D2	87111138	CCCTTGTTCAGCCACTGCACCTGGCCCCTTATTTTGTTTTTGTTTTCTAA
1:84874080:SNP		3870154	0.268462	0.108326	0.0133802	6.00121	0.114356	1	1	47	1	84874080	A	G	+	0.00105781	0.51636		1:84810669:SNP	0.250577	0.49949	0.83354	986	+	ILMN_2275742	DNASE2B	84874033	ATTGCAGGCTGGGTAGCTGGTAGAAATGTTGTGGGCGTTTGTAAGTGGAA
11:85989372:SNP		4150341	0.183751	0.0745926	0.0139443	6.255	0.143219	1	1	2	11	85989372	T	C	+	0.00178448	0.7481		11:85877346:SNP	0.0221141	0.499491	0.69627	986	+	ILMN_1796813	EED	85955814	CCGCTGTTTTAGGGTAGACACTGACAACGTTATGTGTGGTCTTTAACCTG
3:97852335:SNP		3840070	-4.92837	2.00926	0.0143579	6.18741	0.145368	-1	1	38	3	97852335	T	C	+	5.83164e-05	0.044718						986	+	ILMN_1732901	OR5H1	97851541	GGACCCCTTCTCTTCATTTATGTGGGCCCTGCATCTCCGCAAGCAGATGA
19:7032665:SNP	rs1651756	3170161	-0.0220019	0.00901727	0.0148756	6.22271	0.233645	-1	2	16	19	7032665	G	A	+	0.269595	0.63569	coding-synon	19:7020315:SNP	0.012656	0.106011	0.60687	986	+	ILMN_1749755	LOC284428	7030593	TGAATCTCTGGACAGAGCTGGTGCTGAGCGTGTGCGCATCCCGCTTGAGC
10:60037046:SNP		20392	-0.241144	0.0992691	0.0153224	8.83488	0.354691	-1	1	19	10	60037046	C	T	+	0.00287576	0.80931						986	+	ILMN_2122952	CISD1	60028894	CATGGAGGATTTGGGAGATAAAGCTGTGTACTGCCGTTGTTGGAGGTCCA
21:46058346:SNP		6060615	0.343277	0.142825	0.0164362	6.43627	0.153811	1	1	40	21	46058346	G	A	+	0.00130882	0.36383						986	+	ILMN_2135306	KRTAP10-10	46057272	AGGCCTGGTTCCACCCTGGGCAGCACCCCCTCTAGTTCTAATAAAGCCGC
19:36486445:SNP	rs7249826	1470634	-15.1348	6.43988	0.0189751	6.70927	0.21312	1	1	3	19	36486445	C	G	+	0.999984	0.028986	missense					986	+	ILMN_1693124	SDHAF1	36486100	TTCCCAGCCTGACGACGGCGACAGTCCAAGGAACCCCCACGACAGCACGG
11:3656316:SNP	rs16929900	4610008	-0.0240753	0.0102493	0.0190355	6.11527	0.138365	1	1	19	11	3656316	C	G	+	0.11401	0.99079	unknown	11:3641598:SNP	0.03742	0.645168	0.98694	986	+	ILMN_2127007	TRPC2	3647713	AGTGGACGTTTGCTCGCTCCAAGCTGTATCTGTTCTACTTCTGAGAGGGC
20:61431883:SNP		7380634	0.0995994	0.0425392	0.0194262	8.35426	0.214646	1	1	8	20	61431883	A	C	+	0.00570132	0.9037		20:61423593:SNP	0.0130684	0.711343	0.95161	986	+	ILMN_1790136	C20orf20	61427804	GGCCGCCCCAGTGCTGATGGAGATGCCACTTTCGTGTGACTGCGAACATT
11:55038238:SNP		5290056	0.227473	0.0976998	0.0201123	6.29813	0.170933	1	1	6	11	55038238	T	C	+	0.00226826	0.57384		11:55005993:SNP	0.723103	1	0.56701	986	+	ILMN_1762021	TRIM48	55029657	ACCTCCCCAATTACACTGCAGTATGTCCCAAGACCTACCAACCATGTAGA
11:89703619:SNP	rs79824618	2070068	0.0181303	0.00780313	0.0203707	6.37233	0.164607	1	2	31	11	89703619	A	G	+	0.396866	0.657	missense	11:89677115:SNP	0.0496014	0.708623	0.69948	986	+	ILMN_1768365	TRIM64	89701671	ATGTACAGAGAGCTGTGGGAGACATGCCACGTGCCTGACGTGGAGCTGCT
6:96053755:SNP		3840181	0.582522	0.252217	0.02113	6.26676	0.139785	1	1	46	6	96053755	T	G	+	0.000264706	0.50604						986	+	ILMN_1699987	MANEA	96025412	CCAAGCCTGAAAAATGGGCCAATCTGTTAACCACCTCAGGGTCTCGGAGT
11:55579375:SNP		6580592	-0.24444	0.106266	0.0216562	6.10989	0.11417	-1	1	36	11	55579375	A	G	+	0.00240162	0.23838						986	+	ILMN_1692439	OR5L1	55578942	CAGTCACCATGTCTTGGAAGGTGCGTGTGGAGCTGGCTTCTTGCTGCTAC
3:154798137:SNP	rs76555086	2970170	-0.0312085	0.0137256	0.0232104	6.13285	0.17664	-1	1	25	3	154798137	A	G	+	0.0527383	1	intron,untranslated-5	3:154778461:SNP	0.700168	1	0.99902	986	+	ILMN_1751943	MME	154798078	TCCCTGCGGCCTCTGCCTTGGGGAGTTATGTTTTGTTACCGAGATCCGCG
7:80305868:SNP		1010592	0.67533	0.297153	0.0232755	8.63754	0.475507	1	1	35	7	80305868	C	A	+	0.00209381	0.4246						986	+	ILMN_1784863	CD36	80267831	CACCATCATCCCAGTAGCTGCCCTATTCAACTGCAACAGTCTCCAGGACC
2:234600401:SNP		3450735	-0.214173	0.0943779	0.0234798	6.14125	0.122355	-1	3	17	2	234600401	A	T	+	0.00129868	0.60934		2:234589529:SNP	0.302511	1	0.65292	986	+	ILMN_1752813	UGT1A6	234600320	TACCAGGCTTTCTGACTCCTGCTCTAGGATTCTCACCACGTACTGGCTAG
2:211098113:SNP	rs263672	4010053	0.291796	0.132053	0.0273723	6.02524	0.136711	1	3	8	2	211098113	T	C	+	0.999495	0.99602	unknown	2:211002155:SNP	0.964061	1	1	986	+	ILMN_1685590	LOC646215	211097415	TTATTGACTTTTTATAATAGCATTTATGGCGTGTTGAATTGTGGCCCCCC
7:28475255:SNP	rs79835348	6620685	0.0794396	0.0359986	0.0275781	6.13404	0.123379	1	1	15	7	28475255	C	A	+	0.00557809	1	intron,untranslated-5	7:28405670:SNP	0.0218096	0.442131	0.8927	986	+	ILMN_1658986	CREB5	28475233	GGTGGAGTCAATTTATTTCTGAGACGATCTCATTTACCTGAATGAGGAGC
16:1878862:SNP	rs34277837	450161	-0.070377	0.0319562	0.0278914	6.9484	0.299223	-1	3	48	16	1878862	A	G	+	0.0263692	1	intron,near-gene-5,untranslated-3	16:1837991:SNP	0.40081	0.432371	0.82936	986	+	ILMN_2246661	FAHD1	1877224	CACCTGTTTACTTAGGGTATCTACCCAGACCCATCGATTCTGAGTTCGGG
21:46078117:SNP		3310468	49.5578	22.5745	0.0283905	6.17032	0.12832	1	1	37	21	46078117	C	G	+	3.0426e-06	0.005997						986	+	ILMN_1714028	KRTAP12-3	46077848	CCATCATATATGTGACTCCCTCTTGCCAATCTTCGGGGTGCTGCCAGCCC
17:32685450:SNP		1230605	-2.61606	1.19744	0.0291614	6.13128	0.149976	-1	3	26	17	32685450	T	C	+	0.000224645	0.029965						986	+	ILMN_1783593	CCL13	32683470	GAGCTGCTGGCAGTGGGTTTGTATTCGGTTCCCAGGGGTTGAGAGCATGC
2:114258370:SNP	rs116543208	3390563	-0.0173802	0.00796676	0.0293916	6.21689	0.125803	-1	2	38	2	114258370	T	C	+	0.141436	0.94065	untranslated-3	2:114194496:SNP	0.500012	1	0.94153	986	+	ILMN_1781867	FOXD4L1	114256660	AACCTTCGCAGGGCGTCAAGTCATCTTTTCTTGCCTTCGGCTGTGGCTTC
19:15756539:SNP		6840494	0.281332	0.129674	0.0302973	6.28087	0.158062	1	1	6	19	15756539	T	C	+	0.00103043	0.58348						986	+	ILMN_2089484	CYP4F3	15751706	CAGCTCGGAGGAAGGTCTCCTATACACACAAAGCCTGGCATGCACCTTCG
19:50985170:SNP		2510717	-0.10585	0.0488756	0.0305895	6.14498	0.139894	-1	2	28	19	50985170	T	C	+	0.00658012	0.62667		19:50950435:SNP	0.012176	0.598754	0.91665	986	+	ILMN_1721583	C19orf63	50979735	TGTTGCTCACAGCCCTGCGTCCTGCTGCGCCAGGGCCCGCGCCACCGCCA
3:44163484:SNP	rs15965	4480176	0.01932	0.00903182	0.0326893	6.24833	0.14217	1	2	37	3	44163484	A	G	+	0.108078	0.99935	unknown	3:44152174:SNP	0.184919	0.989688	0.99826	986	+	ILMN_1827562		44159797	ATCACTTGGCCACCCCAGCAGTCAGGGAAGCTGGAAGGGTGAGCATTCAG
4:17625859:SNP	rs9884632	6980010	-0.232782	0.108985	0.0329493	8.57367	0.239537	1	1	45	4	17625859	G	A	+	0.00100558	0.99156	untranslated-3	4:17569285:SNP	0.0593986	1	0.91489	986	+	ILMN_1749821	MED28	17616272	GGGAGTTTTAGTCGTAGGCCTTATGATAATTACCCCGCGGTGGTGTGTAG
11:3685607:SNP	rs72844387	3710114	-0.0297686	0.0139797	0.0334847	6.22507	0.196238	-1	1	22	11	3685607	T	G	+	0.0694726	1	untranslated-3	11:3666277:SNP	0.0208812	0.290657	1	986	+	ILMN_1807913	ART1	3666360	GGGGACTGAACCTTACCCAGGGCTGTAGGAGTGAGACTCTGAATAAAGGG
17:32614966:SNP	rs41362349	870603	-0.110029	0.0519393	0.034406	6.05093	0.147633	-1	1	26	17	32614966	T	C	+	0.00886258	0.43464	unknown	17:32554713:SNP	0.0164831	1	0.45134	986	+	ILMN_1725519	CCL11	32612686	TCTTTACCCCCTGGGAGCCCCAATTCGATCCCCTGTCACGTGTGGGCAAT
1:35247979:SNP		450524	-0.0551479	0.0261166	0.0349893	6.0983	0.168068	-1	3	40	1	35247979	T	C	+	0.0217155	0.79447		1:35238905:SNP	0.0386938	0.517763	0.87098	986	+	ILMN_1789575	GJB3	35247910	ATGGGAGTGTGTCAGGTGGAAGCAGCCGTCAGGGTCCCTCTCTGCTCTCT
11:19164569:SNP		6020091	-0.197933	0.0940887	0.0356759	6.12676	0.130797	-1	1	35	11	19164569	G	A	+	0.00121602	0.71816						986	+	ILMN_2243697	ZDHHC13	19138691	ACAGCCATGGCCCCCACCCTCCAGGATTTGGTCGATATGGCATCTGTGCA
19:34991973:SNP		1230270	-0.57194	0.272102	0.0358299	6.21048	0.175064	-1	2	12	19	34991973	T	G	+	0.001143	0.10848						986	+	ILMN_1801223	WTIP	34972879	TGTGTCTGCGCGCGGGGCAAGGGGCTCCACGACAAAAGGACAAGATTTGA
12:121159611:SNP	rs76659878	2450095	-0.043509	0.0208212	0.0369225	6.05571	0.166868	-1	3	15	12	121159611	A	G	+	0.0233266	1	unknown	12:121133880:SNP	0.143427	0.937508	0.99993	986	+	ILMN_1660935	MGC5139	121147830	TCCAGGTGCCTTACGTGTGGCTCTGTCCCTTATGCTGCAGGGGAAAGCTG
6:118823970:SNP		1570347	-0.274921	0.131795	0.0372554	6.81049	0.192465	-1	2	1	6	118823970	A	C	+	0.00143712	0.65038						986	+	ILMN_1682736	LOC643452	118822535	CATGTATGGAGTTCAAAAAGCAATGGGGATTTCCATTCCTTCCCCTGTCA
19:3590070:SNP		5860047	-0.614015	0.295134	0.0377587	6.07256	0.126707	-1	1	17	19	3590070	T	C	+	0.000529919	0.15616						986	+	ILMN_1722826	GIPC3	3585568	ACGTCCAAGAAGACAGCGAGCGCCCAGGAGTTTGCACGCTGTTTAGACTC
17:32685447:SNP	rs75348820	1230605	0.299525	0.145054	0.0392097	6.13128	0.149976	1	3	23	17	32685447	C	A	+	0.000507099	1	untranslated-3	17:32681448:SNP	0.311594	1	0.96348	986	+	ILMN_1783593	CCL13	32683470	GAGCTGCTGGCAGTGGGTTTGTATTCGGTTCCCAGGGGTTGAGAGCATGC
11:55322638:SNP	rs12225462	4480561	-0.0204661	0.00997545	0.0404862	6.26282	0.147102	-1	3	33	11	55322638	T	C	+	0.0938134	1	missense	11:55264310:SNP	0.206529	0.993994	1	986	+	ILMN_1707760	OR4C15	55321782	TGCTCTCTCTGAGAACACACAGTTCTGAAGGGCGCTGGAAAGCTCTCTCC
2:32531463:SNP		7570719	-0.119464	0.058479	0.0413516	6.1446	0.147845	1	1	43	2	32531463	G	A	+	0.00410396	0.69057		2:32411866:SNP	0.739848	1	0.73319	986	+	ILMN_2145760	YIPF4	32502957	GTTTCTGTTTATCTTTCTGACCAAAGGAGCAAGAGGTATAATGGATATGG
12:72180754:SNP		1770661	-174.16	85.7054	0.0424318	7.97837	0.341952	-1	3	17	12	72180754	A	T	+	1.0142e-06	0.001999						986	+	ILMN_1746856	RAB21	72148657	GATGGGTTCAGTGGTATGAGCAGAGGAAGAGATCCCAGATAGTAGCCAGT
1:47571830:SNP		6480215	-0.187709	0.0926524	0.0430573	6.07003	0.132736	-1	2	7	1	47571830	A	G	+	0.00153854	0.72442		1:47500805:SNP	0.142941	0.284212	0.54217	986	+	ILMN_2359698	CYP4Z1	47533159	CACCACGATGTGCATCAAGGAATGCCTCCGCCTCTACGCACCGGTAGTAA
1:16061123:SNP		3390092	-2.5213	1.24728	0.0435225	9.37271	0.254548	-1	1	8	1	16061123	G	A	+	0.000141481	0.034319						986	+	ILMN_1683980	PLEKHM2	16010826	GCCTGGCATCCATGTTGACATCTTCTGACTGTCCCCTGCTTGGCTGGAGC
6:54806543:SNP		50196	0.322673	0.159705	0.0436274	6.20639	0.127404	1	1	29	6	54806543	A	G	+	0.00161714	0.47623		6:54665265:SNP	0.0731594	1	0.46616	986	+	ILMN_1782863	FAM83B	54711568	CCAAGGCCAACGTCCAGTGAGCTTCTACGATCTCATTCAACTGATCGGCG
11:76814242:SNP		3930747	1.07732	0.533584	0.0437734	6.00517	0.133779	1	1	42	11	76814242	A	G	+	0.000233773	0.1331						986	+	ILMN_1660408	OMP	76813885	TTCTGGCGCAAGGAGGACTCGGATGCCATAGATTGGAATGAGGCCGACGC
12:52642430:SNP	rs73317421	3800161	-68.2604	33.941	0.0446006	6.19932	0.153176	-1	1	16	12	52642430	T	C	+	2.0284e-06	0.003998	coding-synon					986	+	ILMN_2163723	KRT7	52626953	CATTGGGCTGACCCTCGGGGGAACCATGGGCAGCAATGCCCTGAGCTTCT
12:124244179:SNP	rs58028686	620092	0.151155	0.0752692	0.0449144	7.0802	0.300287	1	4	5	12	124244179	A	G	+	0.0030426	1	untranslated-3	12:124135807:SNP	0.0713429	0.165817	0.46047	986	+	ILMN_1700380	ATP6V0A2	124196864	GCCCGCATCCTCCTCTATCCTGTTTCGAGGTAGAGAGCTTGGCACTTCTG
17:49419616:SNP		2810598	-0.106402	0.0532963	0.0461806	6.2172	0.152567	1	1	12	17	49419616	C	T	+	0.00341481	0.9561		17:49349494:SNP	0.193011	1	0.70389	986	+	ILMN_1657378	FLJ42842	49414075	TCCCTTCGCCTCTGGATGAGAAAAAAGAGGGACAGTACCCATGAGGCCCC
12:96992494:SNP	rs815890	4760717	-0.0132109	0.00662038	0.046283	6.33807	0.178657	-1	3	46	12	96992494	T	C	+	0.647566	1	unknown	12:96930565:SNP	0.0411727	0.517993	0.96625	986	+	ILMN_1719530	LOC643619	96933914	GCAAGGACTACCAAGTATTGTCTGCTCGAAGAAACATACTGCGAGCTTTG
10:91068399:SNP	rs114913089	2600747	0.0769986	0.0386315	0.046539	10.6925	0.581376	1	1	2	10	91068399	T	C	+	0.0115411	0.9906	untranslated-3	10:91058428:SNP	0.0551589	0.905051	0.97654	986	+	ILMN_1739428	IFIT2	91061705	GCTGACCCAGCATCAGCCACACTCTGGGTTGGAAAATGTTTGCCTGTTGG
11:122742879:SNP	rs57422890	4120324	0.011733	0.00592183	0.0478523	6.13058	0.125832	-1	1	15	11	122742879	C	G	+	0.641983	0.99998	untranslated-3	11:122699412:SNP	0.0806464	0.158192	0.9609	986	+	ILMN_1796247	CRTAM	122709254	AGACAGACTTTTAACATGTAACCAGCACAAAGCAATGTCAGGGAGGAGTG
22:42480184:SNP		990014	-0.112805	0.057431	0.0498093	6.89128	0.232931	-1	3	14	22	42480184	T	C	+	0.0077931	0.69781		22:42418736:SNP	0.0657023	0.141967	1	986	+	ILMN_1706859	C22orf32	42475698	TTGCAAAGTGGCACGCCTGGAGAGAACTTGGAAGCTCCACGCCCCTTCTA
5:140574860:SNP	rs75788551	4730286	0.058812	0.0299517	0.0498809	6.14519	0.125597	1	1	38	5	140574860	C	T	+	0.00811359	1	unknown	5:140475852:SNP	0.0261973	0.439422	0.86783	986	+	ILMN_2041483	PCDHB10	140571951	GCTTGCATCTCATGATTCTAATCACTTCTGTCTATAGTGTACTTGCTCTA
